# Supplementary material for: Synthesis, characterization and bifunctional applications of bidentate silver nanoparticle assisted single drop microextraction as a highly sensitive preconcentrating probe for protein analysis
Source: Royal Society of Chemistry journal article supplement (doi:10.1039/c5ra04032a), 2015-01-01
Supplement: c5ra04032a1.pdf [file c5ra04032a1.pdf]

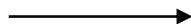

**Fig. S1:** Experimental set-up for NP-SDME coupled with MALDI - TOF MS.

**Fig. S2:** UV-vis absorption of different nanoparticles

**Fig. S2:** MALDI-TOF MS analysis shows Cytochrome c (40 nM) with Ag NPs. and SA 5000ppm at pH 7.2
